# Supplementary material
Source: Springer Nature journal article supplement (https://www.springermedizin.de/resource/supplementary/12885_2011_2831_MOESM2_ESM.pdf/9462034)

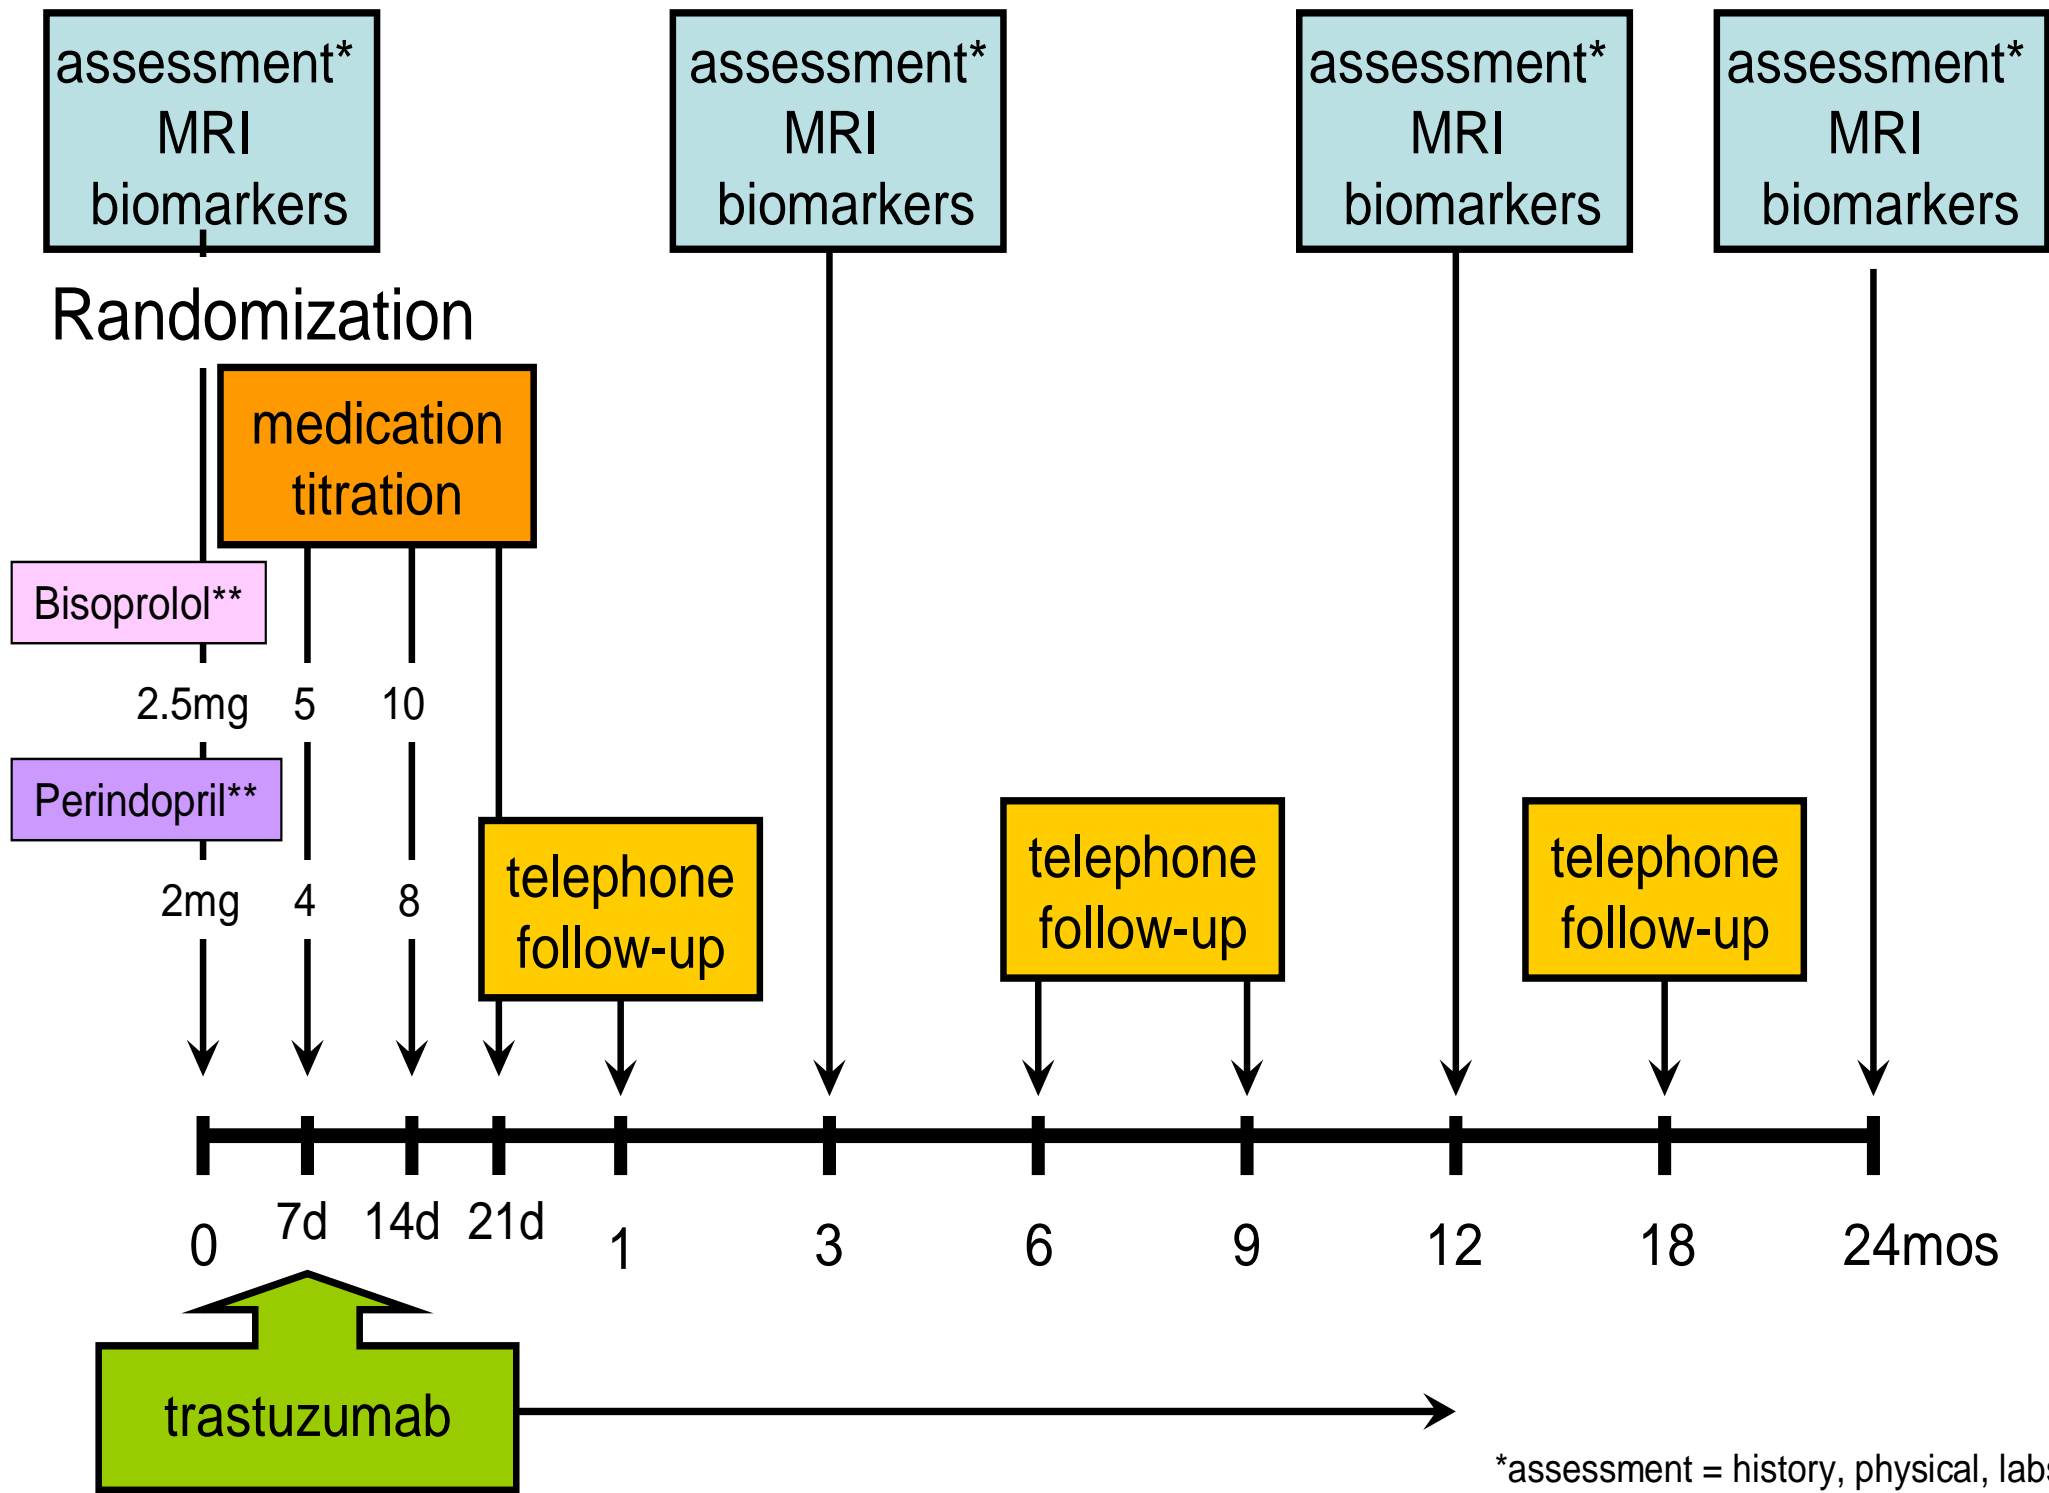

\*assessment = history, physical, labs  
 \*\* or placebo

Supplement: MOESM2 [file 9462034]
